# Supplementary material for: Liquid–liquid extraction of alkali cations by 18-crown-6: complexation and interface crossing studied by MD and PMF simulations
Source: Royal Society of Chemistry journal article supplement (doi:10.1039/c5nj02609a), 2015-12-17
Supplement: c5nj02609a1.pdf [file c5nj02609a1.pdf]

25/09/2015

Benay and Wipff

**Liquid-Liquid Extraction of Alkali Cations by 18-Crown-6: Complexation  
and Interface Crossing Studied by MD and PMF Simulations**

by Gael Benay and Georges Wipff \*

Laboratoire MSM, UMR 7177, Institut de Chimie, 1 rue B. Pascal, 67000 Strasbourg,  
France. [wipff@unistra.fr](mailto:wipff@unistra.fr)

**Electronic Supplementary Information**

**Table S1:** Force field parameters: alkali ion parameters and atomic polarizabilities of Pic<sup>-</sup>, Cl<sup>-</sup> ions, 18C6 and solvents used for the "POL" model. Sets of 18C6 charges.

## Alkali ion parameters

| Ion                 | R* (Å) | ε (kcal / mol) | α (Å <sup>3</sup> ) | Ref.                                                                       |
|---------------------|--------|----------------|---------------------|----------------------------------------------------------------------------|
| Na <sup>+</sup>     | 1.4502 | 0.1            |                     | L. X. Dang, <i>J. Am. Chem. Soc.</i> , <b>117</b> (1995) 6954              |
| Na <sup>+</sup> POL | 1.3350 | 0.1            | 0.240               | L. X. Dang, <i>J. Phys. Chem. A</i> , <b>108</b> (2004) 9014               |
| K <sup>+</sup>      | 1.8700 | 0.1            |                     | L. X. Dang, <i>J. Am. Chem. Soc.</i> , <b>117</b> (1995) 6954              |
| K <sup>+</sup> POL  | 1.7701 | 0.1            | 0.830               | T.-M. Chang, L. X. Dang, <i>J. Phys. Chem. B</i> , <b>101</b> (1997) 10518 |
| Cs <sup>+</sup>     | 2.1798 | 0.1            |                     | L. X. Dang, <i>J. Am. Chem. Soc.</i> , <b>117</b> (1995) 6954              |
| Cs <sup>+</sup> POL | 2.1501 | 0.1            | 2.440               | T.-M. Chang, L. X. Dang, <i>J. Phys. Chem. B</i> , <b>101</b> (1997) 10518 |

Atomic polarizabilities of Pic<sup>-</sup>, Cl<sup>-</sup> ions, 18C6 and solvents used for the "POL" model.

| Atom type                                 | α (Å <sup>3</sup> ) | q (e)  |
|-------------------------------------------|---------------------|--------|
| C (18C6; CHCl <sub>3</sub> )              | 0.878 <sup>a</sup>  |        |
| H <sub>C</sub> (18C6; CHCl <sub>3</sub> ) | 0.135 <sup>a</sup>  |        |
| N (Pic <sup>-</sup> )                     | 0.530 <sup>a</sup>  |        |
| O (18C6; Pic <sup>-</sup> )               | 0.465 <sup>a</sup>  |        |
| C <sub>Pic</sub> (Pic <sup>-</sup> )      | 0.360 <sup>b</sup>  |        |
| H <sub>Pic</sub> (Pic <sup>-</sup> )      | 0.167 <sup>b</sup>  |        |
| Cl (CHCl <sub>3</sub> ; Cl <sup>-</sup> ) | 1.910 <sup>c</sup>  |        |
| O (H <sub>2</sub> O POL3)                 | 0.528 <sup>a</sup>  | -0.730 |
| H (H <sub>2</sub> O POL3)                 | 0.170 <sup>a</sup>  | 0.365  |

a: Caldwell J.W. and Kollman P.A., *J. Phys. Chem.*, **1995**, 99, 6208

b: Wang, J.; Cieplak, P.; Kollman, P. A., *J. Comput. Chem.*, **2000**, 21, 1049

c: Chang, T.-M.; Dang, L. X.; Peterson, K. A., *J. Phys. Chem. B*, **1997**, 101, 3413

d: Dang, L. X., Chang, T.-M., *J. Chem. Phys.* **119** (2003) 9851-9857

## Atomic charges of 18C6 and corresponding dipole moment of dimethyl ether (in D).

| Model                           | q <sub>C</sub> | q <sub>H</sub> | q <sub>O</sub> | q <sub>M</sub> | μ <sub>MeOMe</sub> <sup>a</sup> |
|---------------------------------|----------------|----------------|----------------|----------------|---------------------------------|
| 18C6(-0.4)                      | 0.244          | -0.021         | -0.406         | +1.000         | 1.45                            |
| 18C6(-0.5)                      | 0.300          | -0.025         | -0.500         | +1.000         | 1.79                            |
| 18C6(-0.6)                      | 0.360          | -0.030         | -0.600         | +1.000         | 2.15                            |
| 18C6(-0.34) <sup>b</sup>        | 0.086          | 0.042          | -0.340         | +1.000         | 1.43                            |
| 18C6(-0.30) <sup>c</sup>        | 0.089          | 0.032          | -0.305         | +1.000         | 1.26                            |
| 18C6(+0.4)/M(+0.6) <sup>d</sup> | -0.055         | 0.093          | -0.198         | +0.618         |                                 |

a: Experimental value: 1.31 D ; QM value (HF/6-31G(d,p)) : 1.52 D;

b: ESP HF/6-31G(d,p) charges on 18C6.

c: ESP DFT/6-31G(d,p) charges on 18C6.

d: ESP DFT/6-31G(d,p) charges on the whole complex.

**Table S2:** Complexation of  $M^+$  by 18C6 (" $D_{3d}$ "<sup>a</sup>) in the gas phase: complexation energy  $E_c$ , enthalpy  $\Delta H$ , and free energy  $\Delta G$  (kcal/mol). Average M-O distances. QM (Gaussian 09 software) and AMBER results.

| $M^+$                                                 | $Na^+$             | $Na^+ Pic^-$ | $K^+$              | $K^+ Pic^-$ | $Cs^+{}^b$         | $Cs^+ Pic^-{}^b$ |
|-------------------------------------------------------|--------------------|--------------|--------------------|-------------|--------------------|------------------|
| <b>QM HF/6-31G(d,p)</b>                               |                    |              |                    |             |                    |                  |
| $E_c$                                                 | -87.3              |              | -69.0              |             | -43.6              |                  |
| $\Delta G$                                            | -77.7              |              | -56.5              |             | -32.7              |                  |
| $\Delta H$                                            | -85.7              |              | -68.8              |             | -42.9              |                  |
| $q_M$ (Mulliken)                                      | 0.71               |              | 0.80               |             | 0.89               |                  |
| $q_O$ (Mulliken)                                      | -0.67              |              | -0.68              |             | -0.70              |                  |
| $\langle d_{M-O} \rangle$ (Å)                         | 2.700              |              | 2.814              |             | 3.131              |                  |
| <b>QM HF/6-311++G(d,p)</b>                            |                    |              |                    |             |                    |                  |
| $E_c$                                                 | -84.5              |              | -70.2              |             | -48.3              |                  |
| $\Delta G$                                            | -74.8              |              | -57.7              |             | -37.2              |                  |
| $\Delta H$                                            | -82.8              |              | -69.9              |             | -47.5              |                  |
| <b>QM DFT/6-31G(d,p)</b>                              |                    |              |                    |             |                    |                  |
| $E_c$                                                 | -83.3              | -33.2        | -70.5              | -31.5       | -34.6              | -13.6            |
| $\Delta G$                                            | -74.4              |              | -59.6              |             | -23.7              |                  |
| $\Delta H$                                            | -81.4              |              | -69.0              |             | -33.4              |                  |
| $q_M$ (ESP)                                           | 0.66               | 0.41         | 0.62               | 0.43        | 0.78               | 0.53             |
| $q_O$ (ESP)                                           | -0.25              | -0.20        | -0.20              | -0.18       | -0.20              | -0.20            |
| $\langle d_{M-O} \rangle$ (Å)                         | 2.769              |              | 2.807              |             | 3.149              |                  |
| <b>QM DFT/6-311++G(d,p)</b>                           |                    |              |                    |             |                    |                  |
| $E_c$                                                 | -82.4              |              | -70.3              |             | -47.9              |                  |
| $\Delta G$                                            | -73.5              |              | -59.4              |             | -37.4              |                  |
| $\Delta H$                                            | -80.6              |              | -68.7              |             | -50.3              |                  |
| <b>AMBER <math>q_O</math> -0.4</b>                    |                    |              |                    |             |                    |                  |
| $E_c$                                                 | -56.5              |              | -49.5              |             | -39.8              |                  |
|                                                       | 31.4% <sup>c</sup> |              | 29.6% <sup>c</sup> |             | 16.9% <sup>c</sup> |                  |
| <b>AMBER <math>q_O</math> -0.4 + POL</b>              |                    |              |                    |             |                    |                  |
| $E_c$                                                 | -66.5              |              | -59.2              |             | -48.3              |                  |
|                                                       | 19.3% <sup>c</sup> |              | 15.8% <sup>c</sup> |             | 0.8% <sup>c</sup>  |                  |
| <b>AMBER <math>q_O</math> -0.5</b>                    |                    |              |                    |             |                    |                  |
| $E_c$                                                 | -68.2              |              | -61.1              |             | -49.7              |                  |
|                                                       | 17.2% <sup>c</sup> |              | 13.1% <sup>c</sup> |             | 3.7% <sup>c</sup>  |                  |
| <b>AMBER <math>q_O</math> -0.6</b>                    |                    |              |                    |             |                    |                  |
| $E_c$                                                 | -79.3              |              | -72.4              |             | -59.8              |                  |
|                                                       | 3.8% <sup>c</sup>  |              | 3.0% <sup>c</sup>  |             | 24.8% <sup>c</sup> |                  |
|                                                       |                    |              | -75.8 <sup>d</sup> |             |                    |                  |
|                                                       |                    |              | 7.8% <sup>c</sup>  |             |                    |                  |
| <b>AMBER <math>q_O</math> -0.34<sup>e</sup></b>       |                    |              |                    |             |                    |                  |
| $E_c$                                                 | -63.7              |              | -56.7              |             | -46.1              |                  |
|                                                       | 22.7% <sup>c</sup> |              | 19.3% <sup>c</sup> |             | 3.7% <sup>c</sup>  |                  |
| <b>AMBER <math>q_O</math> -0.34 + POL<sup>e</sup></b> |                    |              |                    |             |                    |                  |
| $E_c$                                                 | -73.3              |              | -66.1              |             | -54.5              |                  |
|                                                       | 11.0% <sup>c</sup> |              | 6.0% <sup>c</sup>  |             | 13.8% <sup>c</sup> |                  |
| <b>AMBER <math>q_O</math> -0.30<sup>f</sup></b>       |                    |              |                    |             |                    |                  |
| $E_c$                                                 | -56.1              |              | -49.2              |             | -39.8              |                  |
|                                                       | 31.9% <sup>c</sup> |              | 30.0% <sup>c</sup> |             | 16.9% <sup>c</sup> |                  |

a: Conformation of 18C6 complexed and uncomplexed.

b:  $Cs^+$  sits in "perched" position over the ring and is described by a SDD basis set with the Stuttgart/Dresden ECPs.

c: % difference relative to  $E_c$  at the QM DFT/6-311++G(d,p) level.

d: Cheatham's  $M^+$  parameters: Joung, I. S., Cheatham III, T. E., *J. Phys. Chem. B*, **2008**, *112*, 9020.

e: ESP HF/6-31G(d,p) charges on 18C6.

f: ESP DFT/6-31G(d,p) charges on 18C6.

**Table S3:** Dissociation PMF<sub>0.01+t</sub> of 18C6/M<sup>+</sup> X<sup>-</sup> complexes (sampling time *t* in ns). Free energy difference  $\Delta A_{CD}$  (in kcal / mol) between complexed and decomplexed states in water and at interface. Corresponding "selectivities"  $\Delta\Delta A_{CD}$

| M <sup>+</sup>                                        | $q_0$              | <i>t</i> | Na <sup>+</sup> | K <sup>+</sup> | Cs <sup>+</sup> | Selectivity<br>$\Delta\Delta A_{CD}$ |      |       | Order       |
|-------------------------------------------------------|--------------------|----------|-----------------|----------------|-----------------|--------------------------------------|------|-------|-------------|
|                                                       |                    |          |                 |                |                 | K/Na                                 | Cs/K | Na/Cs |             |
| <b>In water M<sup>+</sup> Cl<sup>-</sup></b>          |                    |          |                 |                |                 |                                      |      |       |             |
| (SPC/E)                                               | -0.4               | 0.16     | 6.2             | 6.0            | 5.1             | +0.2                                 | +0.9 | -1.1  | Na > K > Cs |
|                                                       |                    | 0.5      | 4.6             | 4.0            | 2.8             | +0.6                                 | +1.2 | -1.8  |             |
|                                                       | -0.5               | 0.16     | 5.0             | 8.1            | 3.5             | -3.1                                 | +4.6 | -1.5  | K > Na > Cs |
|                                                       |                    | 0.5      | 6.0             | 8.8            | 4.3             | -2.8                                 | +4.5 | -1.7  |             |
|                                                       | -0.6               | 0.16     | 8.4             | 9.1            | 5.0             | -0.7                                 | +4.1 | -3.4  | K > Na > Cs |
|                                                       |                    | 0.5      | 6.6             | 8.3            | 4.4             | -1.7                                 | +3.9 | -2.2  |             |
|                                                       | -0.34 <sup>a</sup> | 0.5      | 6.4             | 7.9            | 3.3             | -1.5                                 | +4.6 | -3.1  | K > Na > Cs |
|                                                       |                    | 3.0      | 6.0             | 7.4            | 3.4             | -1.4                                 | +4.0 | -2.6  |             |
|                                                       | -0.4+POL           | 0.5      | 3.3             | 8.5            | 4.2             | -2.8                                 | +1.4 | +1.4  | K > Cs > Na |
|                                                       | (TIP3P)            | -0.6     | 0.5             | 7.0            | 11.0            | 5.2                                  | -4.0 | +5.8  | -1.8        |
| -0.6 Ch. <sup>b</sup>                                 |                    | 0.5      | 5.2             | 10.7           | 8.3             | -5.5                                 | +2.4 | +3.1  |             |
|                                                       | Exp. <sup>c</sup>  |          | 1.1             | 2.8            | 1.3             | -1.7                                 | +1.5 | +0.2  | K > Cs > Na |
| <b>At the interface M<sup>+</sup> Pic<sup>-</sup></b> |                    |          |                 |                |                 |                                      |      |       |             |
| CHCl <sub>3</sub> / SPC/E                             | -0.34 <sup>c</sup> | 0.5      | 5.1             | 7.3            | 6.2             | -2.2                                 | +1.1 | +1.1  | K > Cs > Na |

a: ESP HF 6-31G(d,p) charges on 18C6.

b: Cheatham's parameters.

c: Experimental  $-\Delta G_c$  decomplexation energy.

**Table S4:** Analysis of 18C6/  $M^+$  complexes in water and at interface:  $M^+ \dots O(18C6)$  and  $M^+ \dots X^-$  distances (in Å), hydration number of  $M^+$ ,  $n_{+/-}$  number of  $g^+ \leftrightarrow g^-$  interconversions of OC-CO dihedrals, and interaction energies (in kcal/mol) between 18C6,  $M^+$  and Water. Averages during 2 ns except when otherwise noted. <sup>a</sup> See also Figures S7 to S9.

|                         |                       | Na <sup>+</sup>    | K <sup>+</sup> | Cs <sup>+</sup>         |
|-------------------------|-----------------------|--------------------|----------------|-------------------------|
| <i>In Water</i>         |                       |                    |                |                         |
| 18C6(-0.6)              | $d_{M-O(18C6)}$       | 2.6 (x4), 3.2 (x2) | 3.0 (x6)       | 3.2 (x6)                |
|                         | $d_{M-Cl}$            | 14.5 ± 3.9         | 14.6 ± 3.5     | 13.0 ± 4.5              |
|                         | $N_{Water}(M^+)$      | 2.1 ± 0.3          | 2.6 ± 0.7      | 3.5 ± 1.1               |
|                         | $n_{+/-}$             | 70                 | 28             | 9                       |
|                         | $E_{18C6/M}$          | -86 ± 6            | -70 ± 5        | -62 ± 6                 |
|                         | $E_{18C6/Wat}$        | -30 ± 7            | -33 ± 7        | -41 ± 9                 |
|                         | $E_{M/Wat}$           | -62 ± 10           | -48 ± 10       | -36 ± 18                |
| 18C6(-0.4) POL          | $d_{M-O(18C6)}$       | 2.9 (x6)           | 2.9 (x6)       | 3.3 (x6) <sup>a</sup>   |
|                         | $d_{M-Cl}$            | 14.7 ± 3.4         | 13.8 ± 4.2     | 14.0 ± 3.3 <sup>a</sup> |
|                         | $N_{Water}(M^+)$      | 2.0 ± 0.1          | 2.1 ± 0.5      | 3.5 ± 0.9 <sup>a</sup>  |
|                         | $n_{+/-}$             | 18                 | 4              | 6 <sup>a</sup>          |
| 18C6(-0.34)             | $d_{M-O(18C6)}$       | 2.8 (x6)           | 3.0 (x6)       | 3.2 (x6)                |
|                         | $d_{M-Cl}$            | 16 ± 3             | 15 ± 3         | 15 ± 3                  |
|                         | $N_{Water}(M^+)$      | 2.0 ± 0.1          | 2.7 ± 0.5      | 3.5 ± 0.7               |
|                         | $n_{+/-}$ conversions | 61                 | 9              | 0                       |
|                         | $E_{18C6/M}$          | -67 ± 3            | -53 ± 3        | -47 ± 3                 |
|                         | $E_{18C6/Wat}$        | -16 ± 5            | -21 ± 5        | -27 ± 6                 |
|                         | $E_{M/Wat}$           | -74 ± 10           | -63 ± 9        | -53 ± 9                 |
| <i>At the interface</i> |                       |                    |                |                         |
| 18C6(-0.34)             | $d_{M-O(18C6)}$       | 2.8 (x6)           | 3.0 (x6)       | 3.2 (x6)                |
|                         | $d_{M-Pic}$           | 6.9 ± 1.0          | 20 ± 11        | 13.3 ± 4.7              |
|                         | $N_{Water}(M^+)$      | 2.1 ± 0.3          | 2.1 ± 0.7      | 3.0 ± 0.8               |
|                         | $n_{+/-}$             | 26                 | 0              | 0                       |
|                         | $E_{18C6/M}$          | -67 ± 4            | -57 ± 3        | -47 ± 3                 |
|                         | $E_{18C6/Wat}$        | 0 ± 5              | -2 ± 4         | -2 ± 3                  |
|                         | $E_{M/Pic}$           | -44 ± 4            | -23 ± 17       | -30 ± 11                |
|                         | $E_{M/Wat}$           | -60 ± 10           | -61 ± 20       | -54 ± 14                |

<sup>a</sup>: Average over 1 ns since  $M^+$  decomplexes afterwards.

**Figure S1:** Complexation of  $K^+ Cl^-$  by 18C6(-0.6) in SPC/E water: cumulated view of the complex (C in green, O in red, K in purple; recentered on the mean plane of  $O_1$ ,  $O_7$  and  $O_{13}$  oxygens) at different steps of  $PMF_{0.01+0.16}$ ,  $PMF_{0.01+0.5}$  and  $PMF_{0.01+3.0}$ .

| $d_{K-CM(18C6)}$ | $PMF_{0.01+0.16}$                                                                  | $PMF_{0.01+0.5}$                                                                    | $PMF_{0.01+3.0}$                                                                     |
|------------------|------------------------------------------------------------------------------------|-------------------------------------------------------------------------------------|--------------------------------------------------------------------------------------|
| 0.9 Å            | 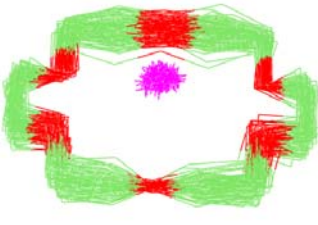  |   |   |
| 2.5 Å            |   |   |   |
| 8.3 Å            |  |  |  |

☞ Note that along a "rapid" PMF (for instance  $PMF_{0.01+0.08}$  or  $PMF_{0.01+0.16}$ )  $M^+$  always sits on top of a single face of the crown. Along a "long" PMF ( $PMF_{0.01+3}$ ) it explores the two faces of the crown at long distances ( $d > 8 \text{ \AA}$ ), while being restrained at a single face at shorter distances, thereby causing some entropy penalty.

**Figure S2:** Complexation PMF of  $K^+ Cl^-$  by 18C6(-0.4) in SPC/E water: association (in blue) and dissociation (in red) pathways. Free energy curves ( $\Delta A$  in kcal / mol, as a function of the  $d$  distance in Å) for different sampling times.

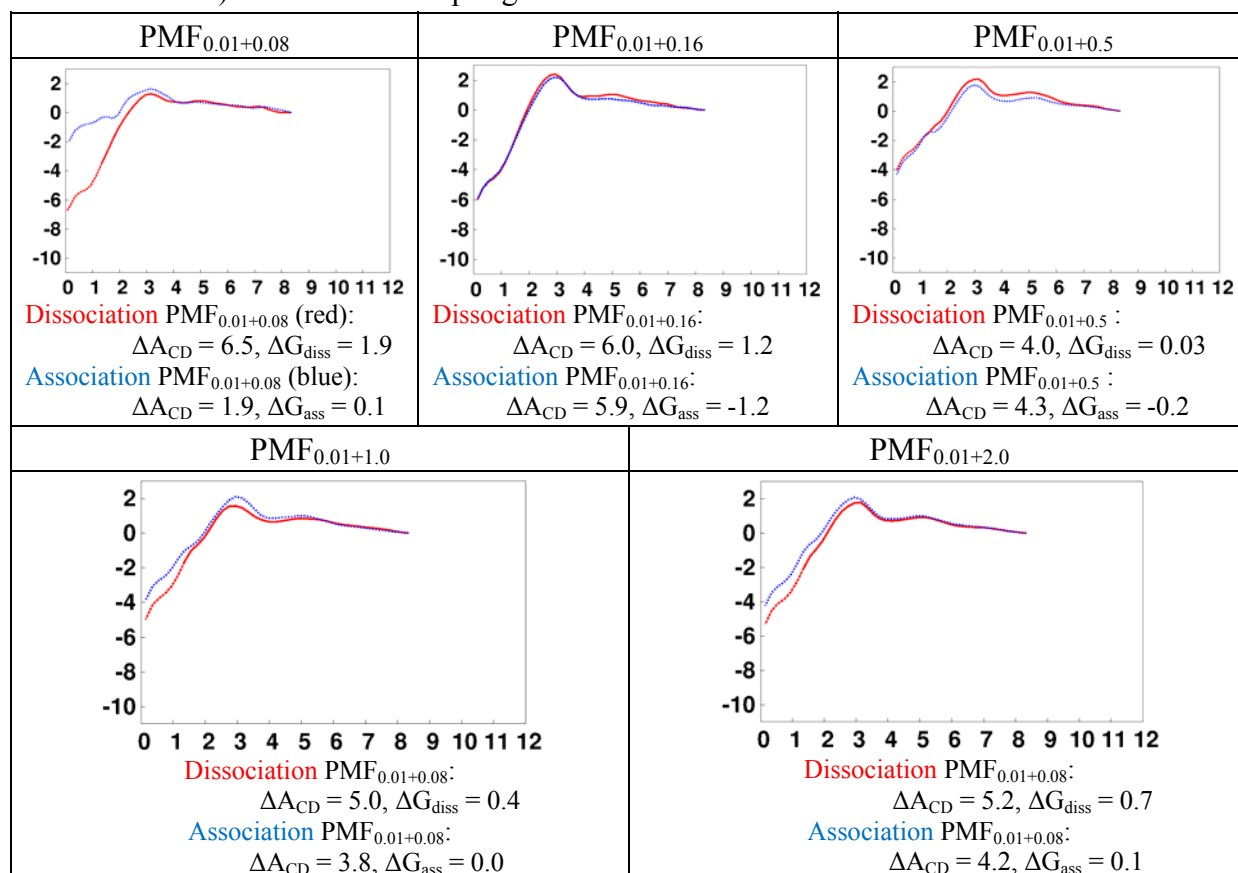

**Figure S3:** Complexation of  $K^+ Cl^-$  by 18C6 in SPC/E water: association or dissociation PMF<sub>0.01+0.5</sub> with different charges. From top to bottom: (i) Free energy curves ( $\Delta A$  in kcal / mol, as a function of the  $d$  distance in Å) and binding energies  $\Delta G_{\text{ass}}$  and  $\Delta G_{\text{diss}}$ . (ii) Average energy components as a function of the  $d$  distance. Energies for the C (complexed) and D (decomplexed) states from the "diss" and "ass" pathways. (iii) Typical structures along the Association and Dissociation PMFs (at K-CM(18C6) distances of 0.7, 1.3 and 1.7 Å, respectively). PMFs results with the three cations and PMF<sub>0.01+0.016</sub> sampling are shown in Figure S4.

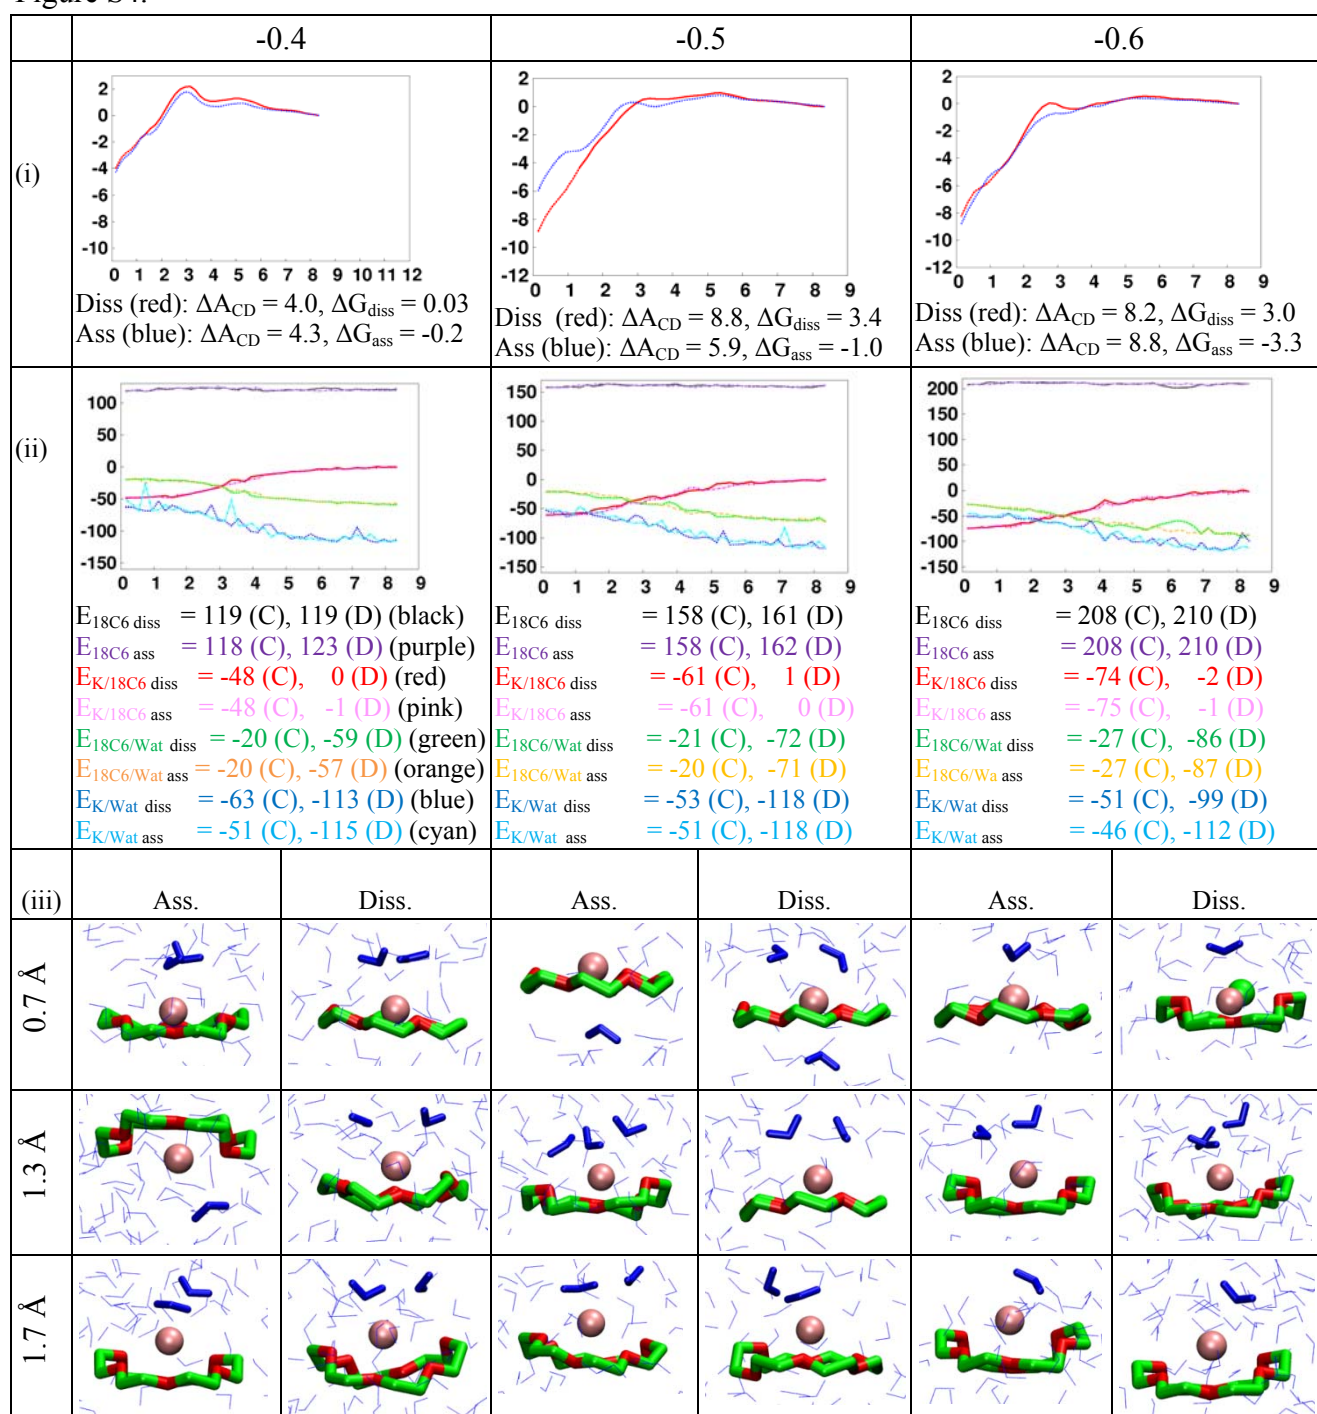



**Figure S4:** Complexation of  $M^+ Cl^-$  by 18C6 in SPC/E water: dissociation PMF<sub>0.01+0.16</sub> with different charges. Free energy curves ( $\Delta A$  in kcal / mol, as a function of the  $d$  distance in Å) for  $Na^+$  to  $Cs^+$  cations.

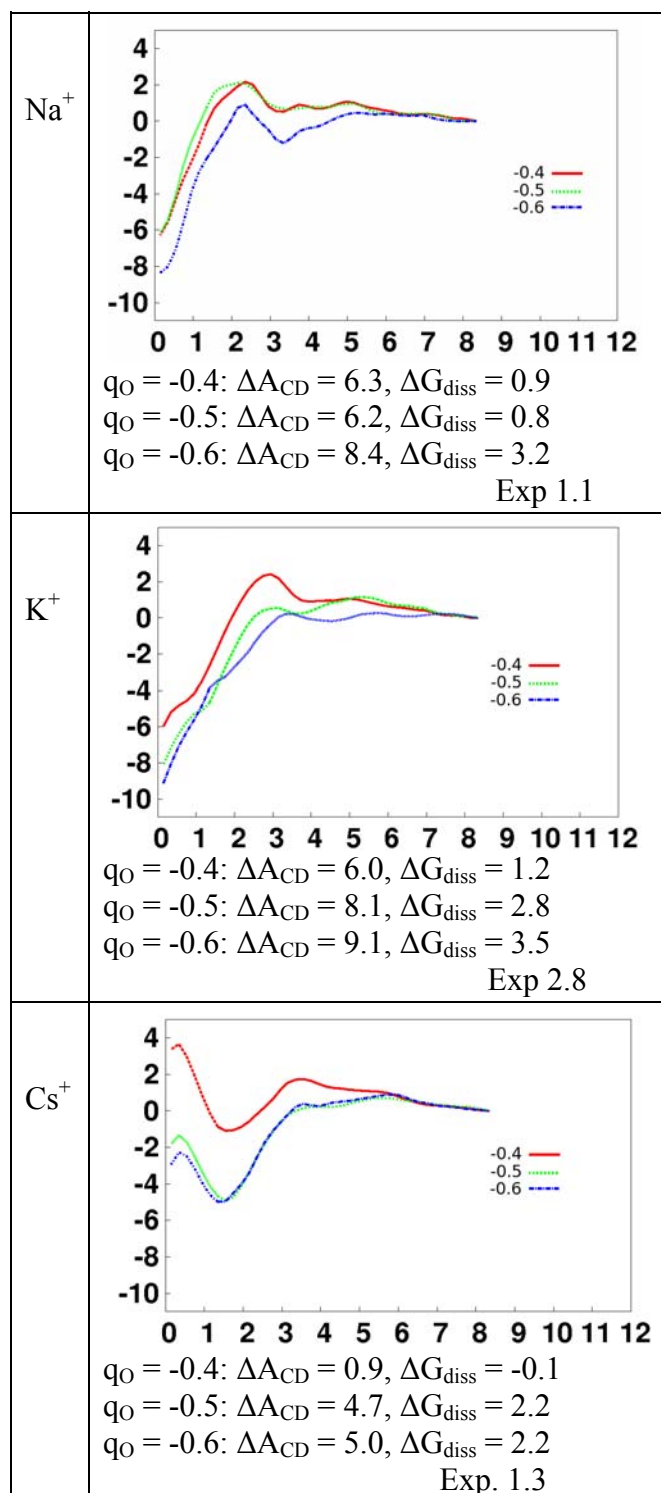

**Figure S5:** Complexation PMF<sub>0.01+0.5</sub> of Na<sup>+</sup> to Cs<sup>+</sup> chlorides by 18C6(-0.6) in SPC/E water. From top to bottom: (i) Free energy curves ( $\Delta A$  in kcal / mol, as a function of the  $d$  distance in Å). (ii) Snapshots of the complexed and decomplexed states.

(iii to v): Analysis as a function of the  $d$  distance: (iii) Curves of energy components, and average energies for Complexed and Decomplexed states. (iv) Number of H<sub>2</sub>O molecules coordinated to M<sup>+</sup>. (v) The six OC-CO dihedrals of 18C6 along the PMF. Results with other models are shown in Figure S6.

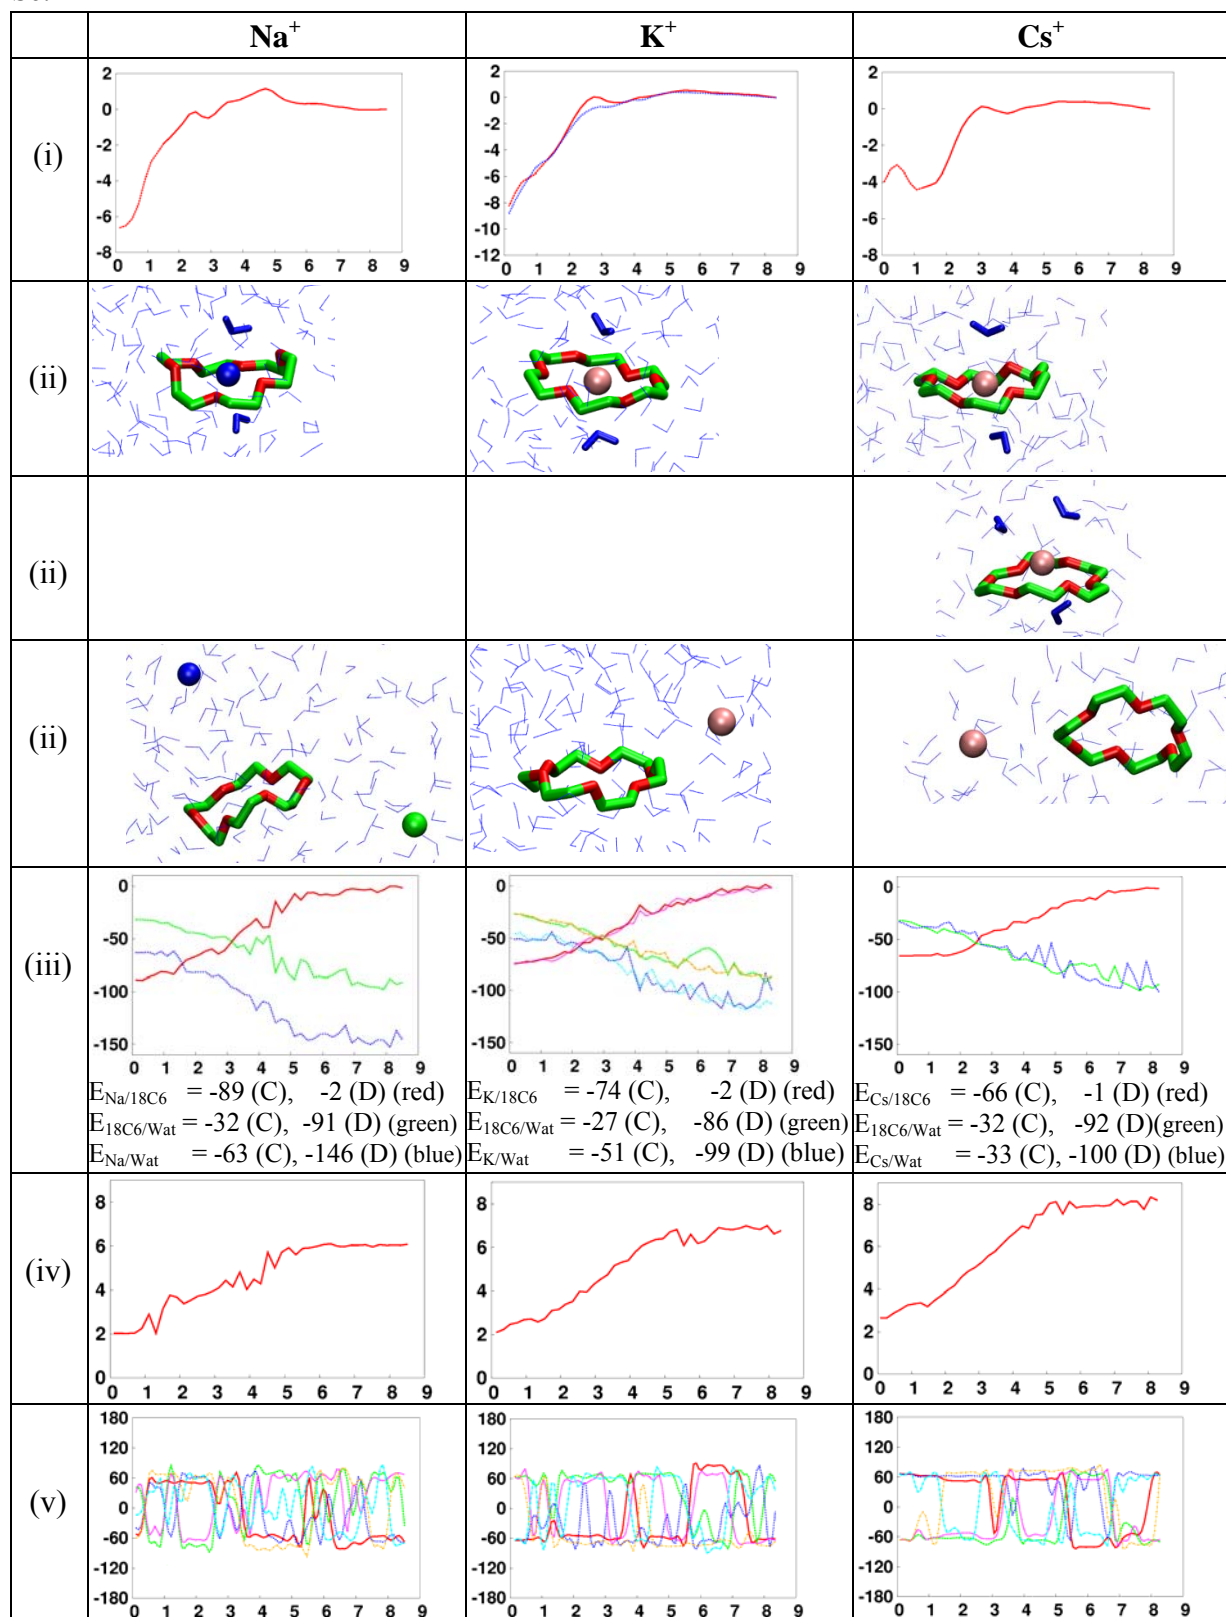

**Figure S6:** Dissociation PMF<sub>0.01+0.5</sub> of 18C6/ M<sup>+</sup> X<sup>-</sup> complexes in water. (i) Free energy curves ( $\Delta A$  in kcal / mol, as a function of the  $d$  distance in Å) with three models: 18C6(-0.6) (red), 18C6(-0.34) (blue) and POL (green). Snapshots along the PMF ("POL" model) at several  $d$  distances : (ii)  $d \approx 0$  Å ( complexed state); (iii)  $d \approx 2$  Å ; (iv)  $d \approx 8$  Å (decomplexed state).

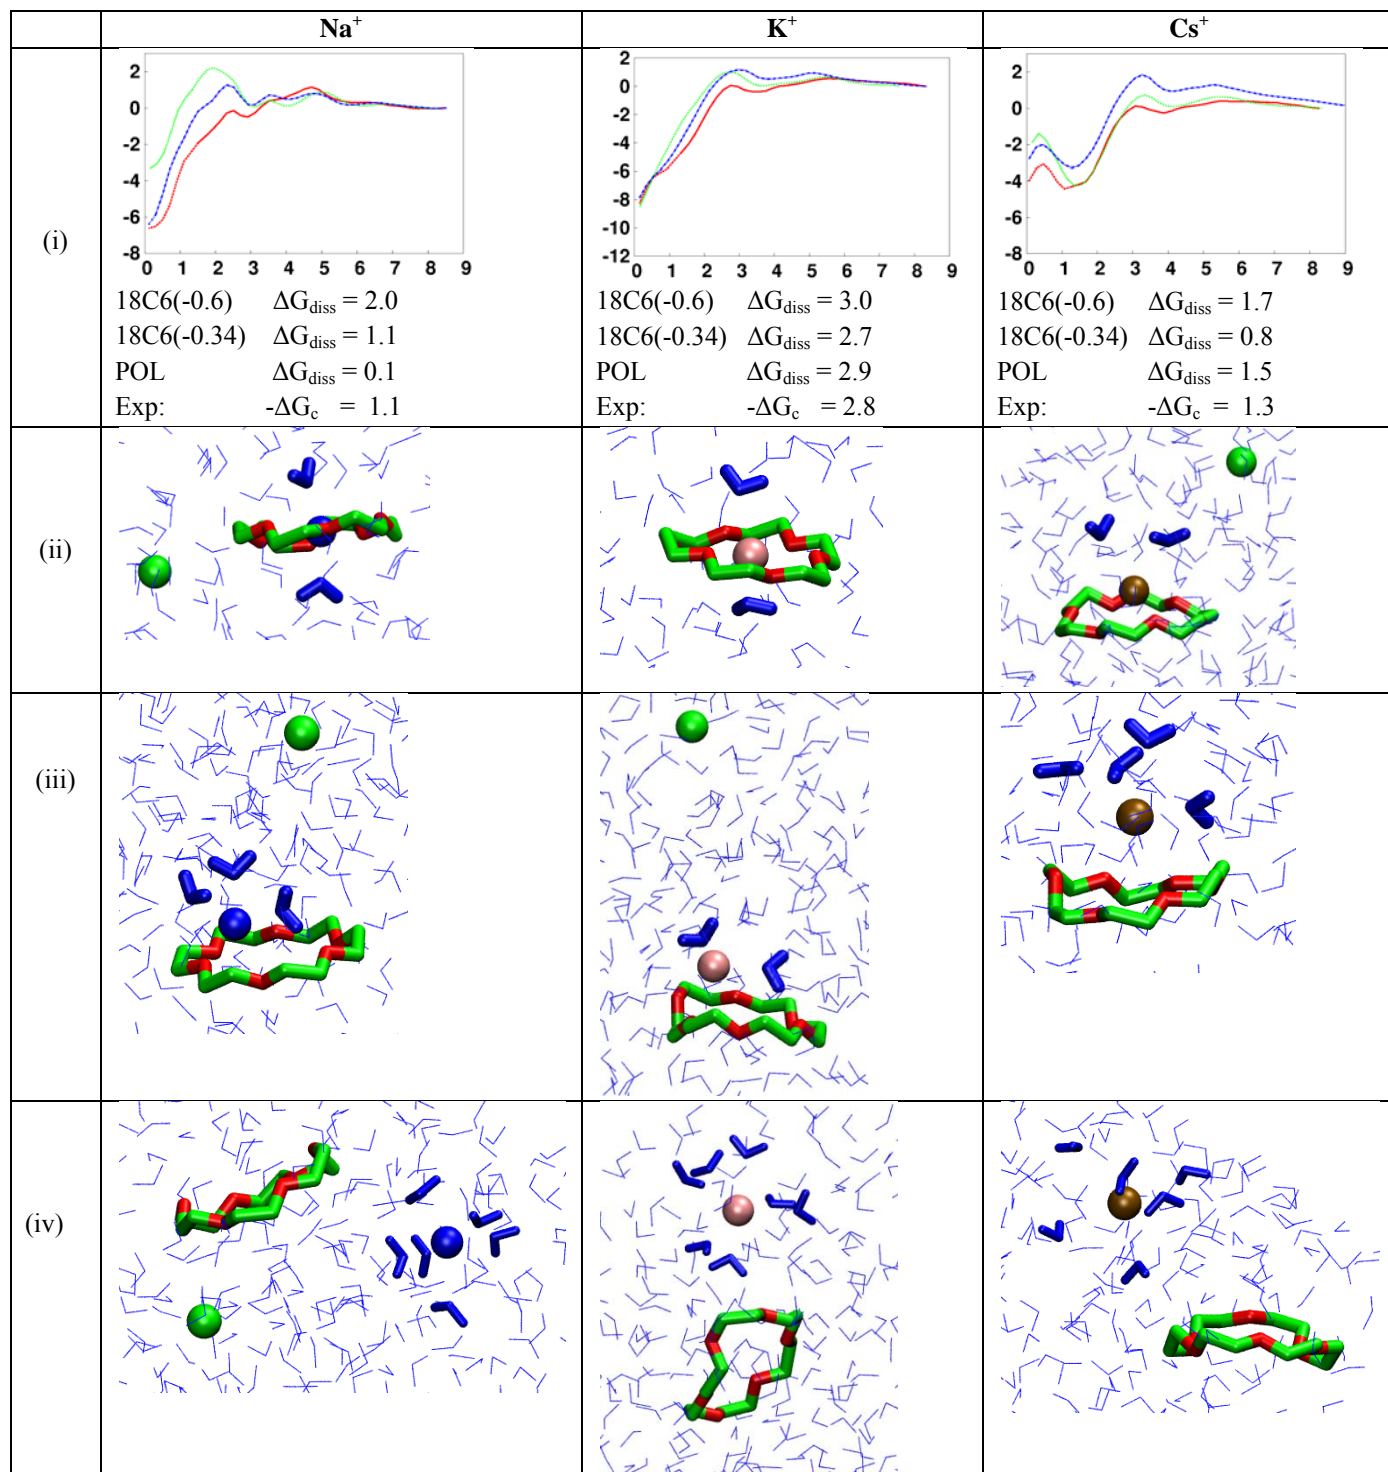

**Figure S7:** Dynamics of 18C6(-0.6)/M<sup>+</sup> Cl<sup>-</sup> complexes in SPC/E water. From top to bottom: (i) Snapshots after 2 ns. Time evolution of distances (in Å) (ii) M-O(18C6), (iii) M-Cl. (iv) Time evolution of: number of water molecules coordinated to M, (v) of OC-CO dihedrals. (vi) Energy components analysis (in kcal / mol, averages over the last 1.5 ns).

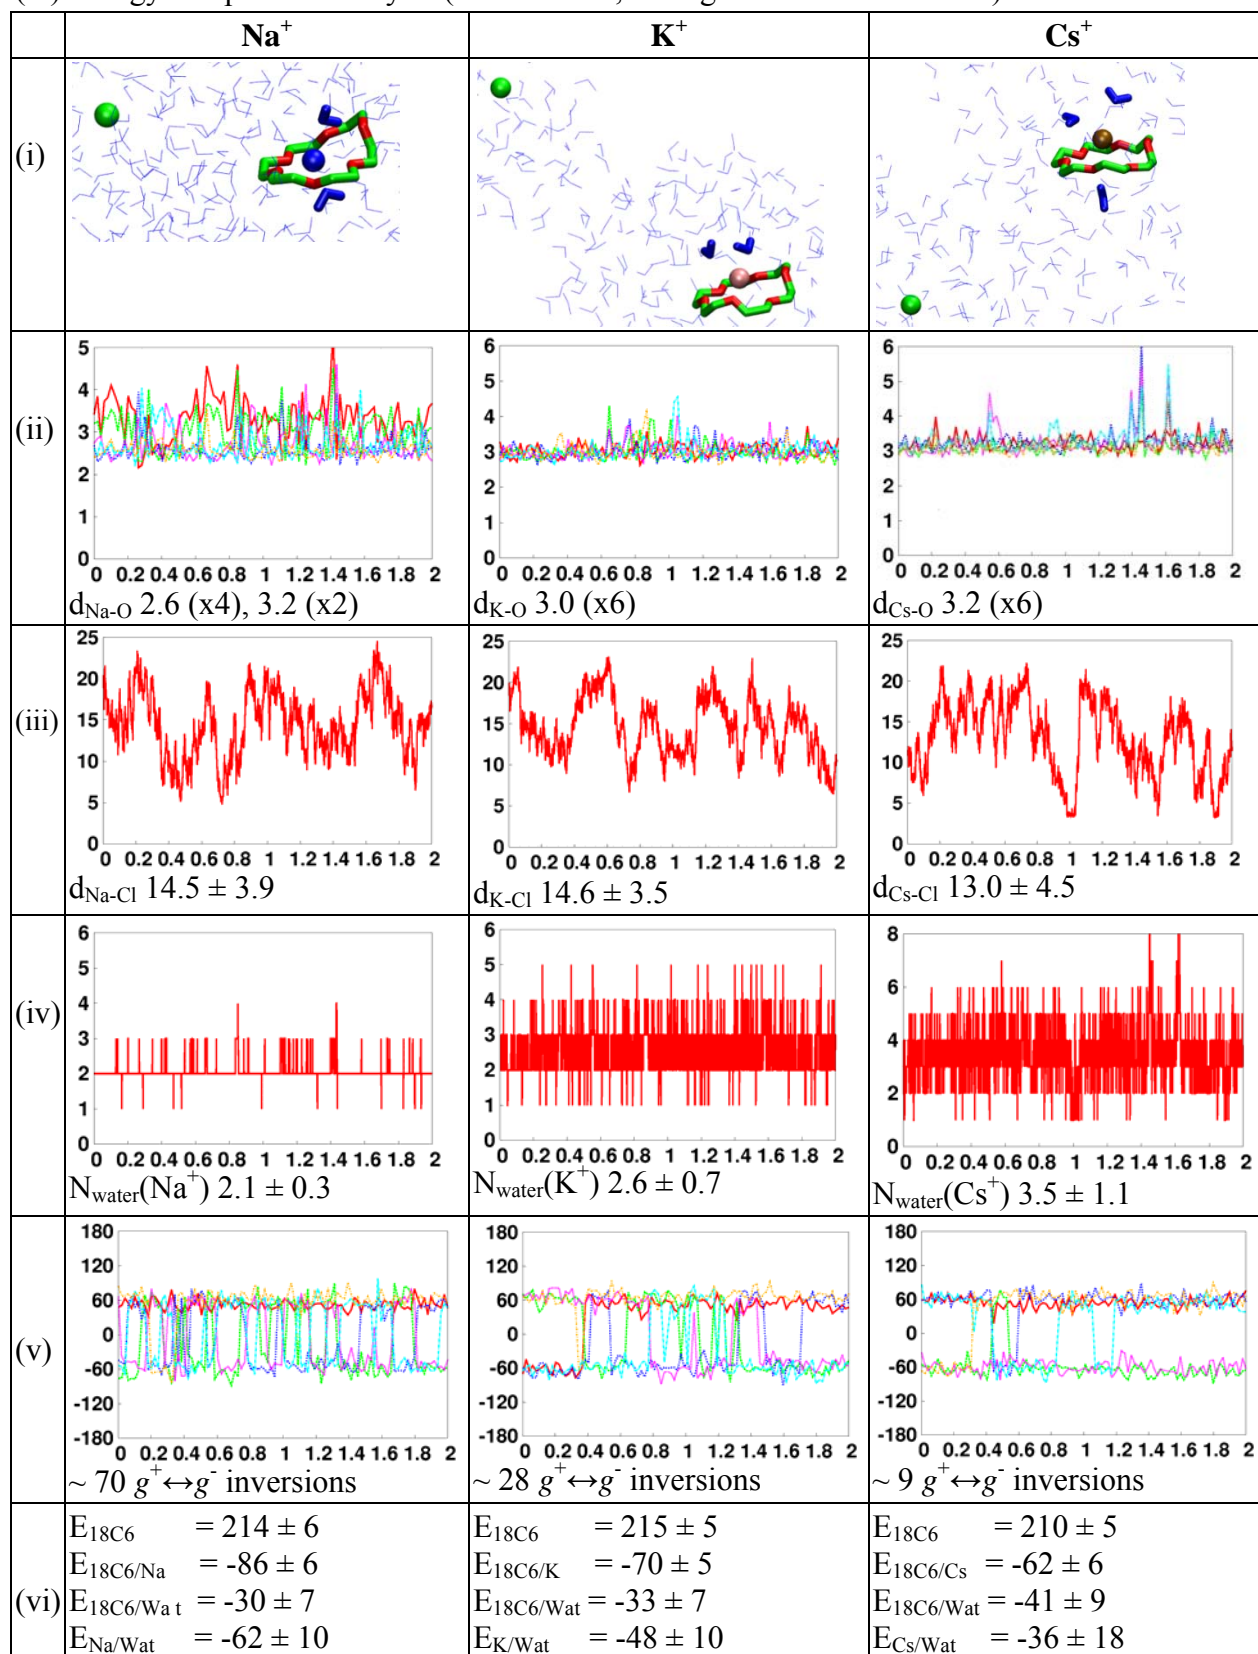

**Figure S8:** Dynamics of 18C6(-0.34)/M<sup>+</sup> Cl<sup>-</sup> complexes in SPC/E water. From top to bottom: (i) snapshots. Time evolution of distances (in Å) (ii) M-O(18C6), (iii) M-Cl. Time evolution of (iv) number of water molecules coordinated to M, (v) OC-CO dihedrals. (vi) Energy components analysis (in kcal / mol; averages over the last 1.5 ns).

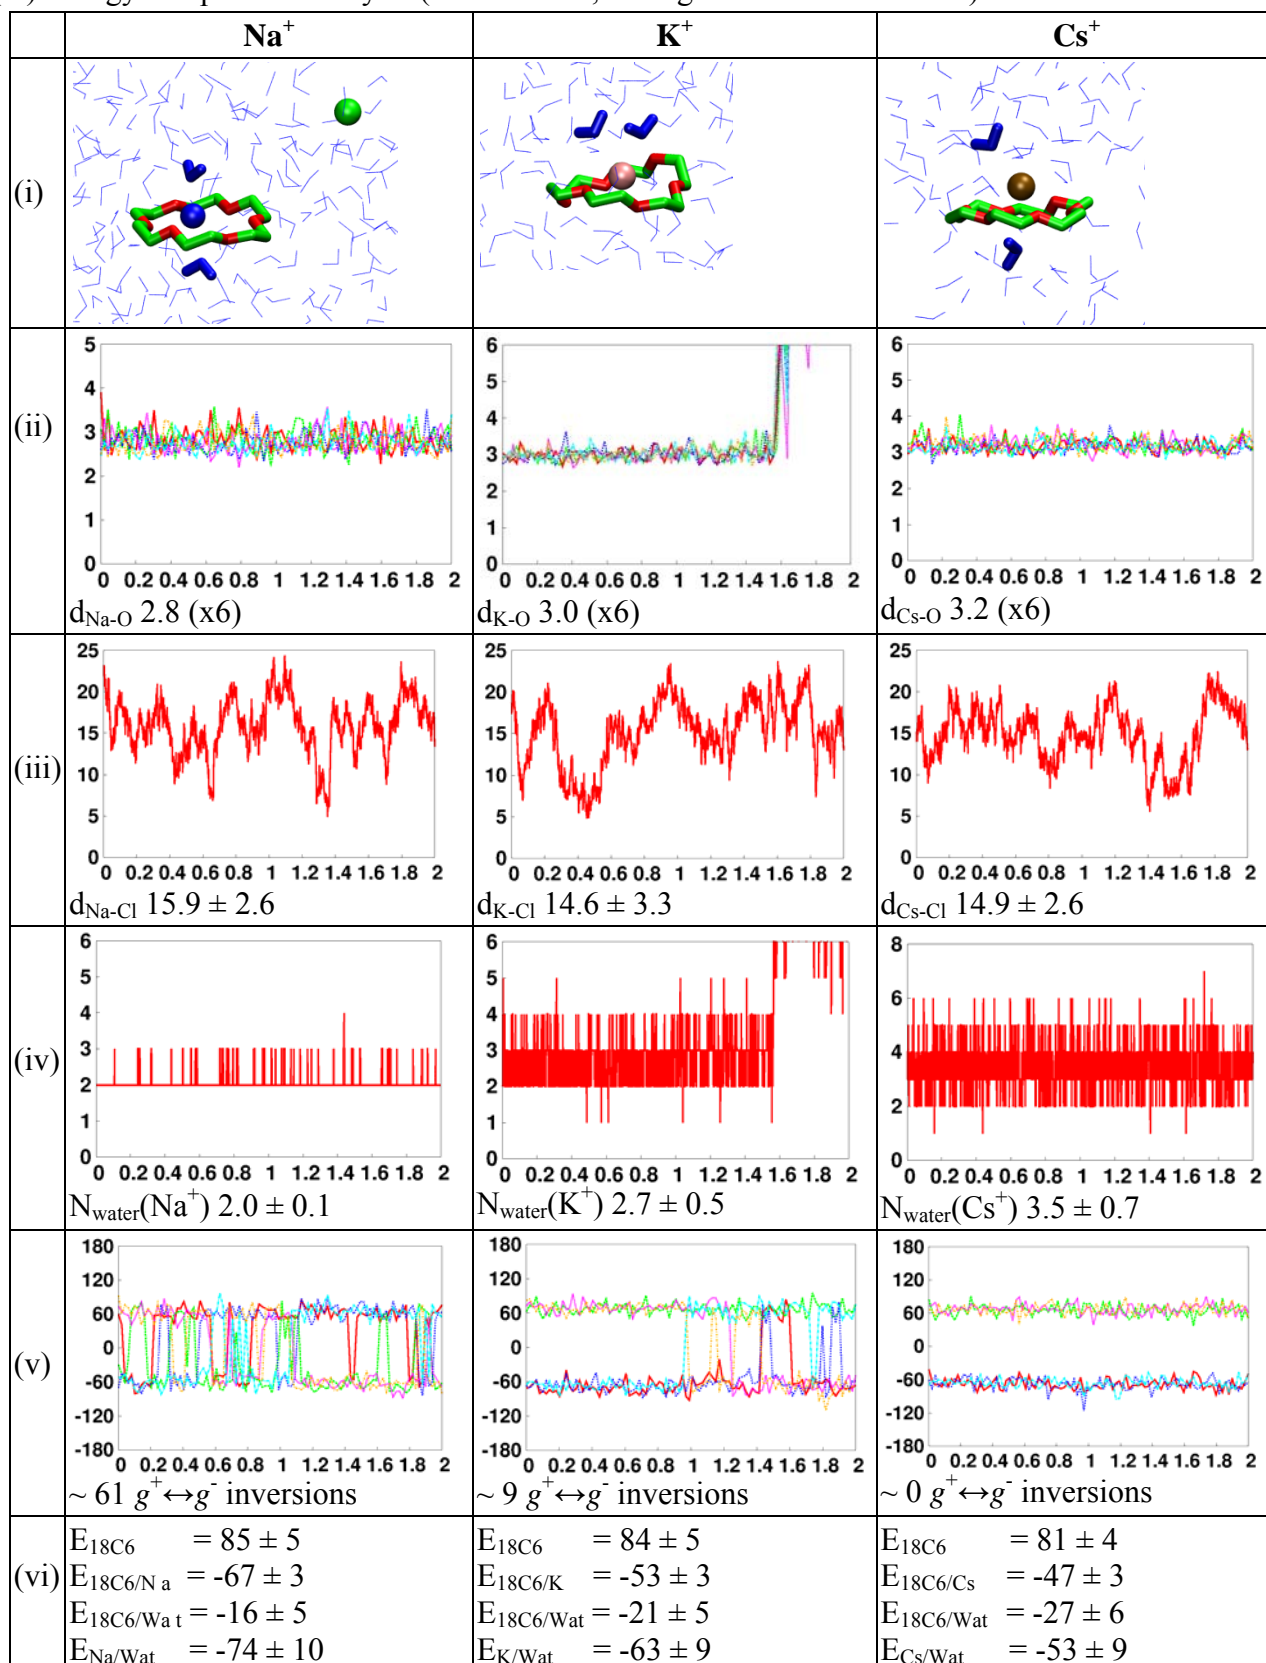

**Figure S9:** Dynamics of 18C6(-0.4)/M<sup>+</sup> Cl<sup>-</sup> complexes in POL3 water ("POL model"). From top to bottom: (i) snapshots of the complexes. Time evolution of distances (in Å) of (ii) M-O(18C6), (iii) M-Cl. Time evolution of (iv) number of water molecules coordinated to M, (v) of OC-CO dihedrals.

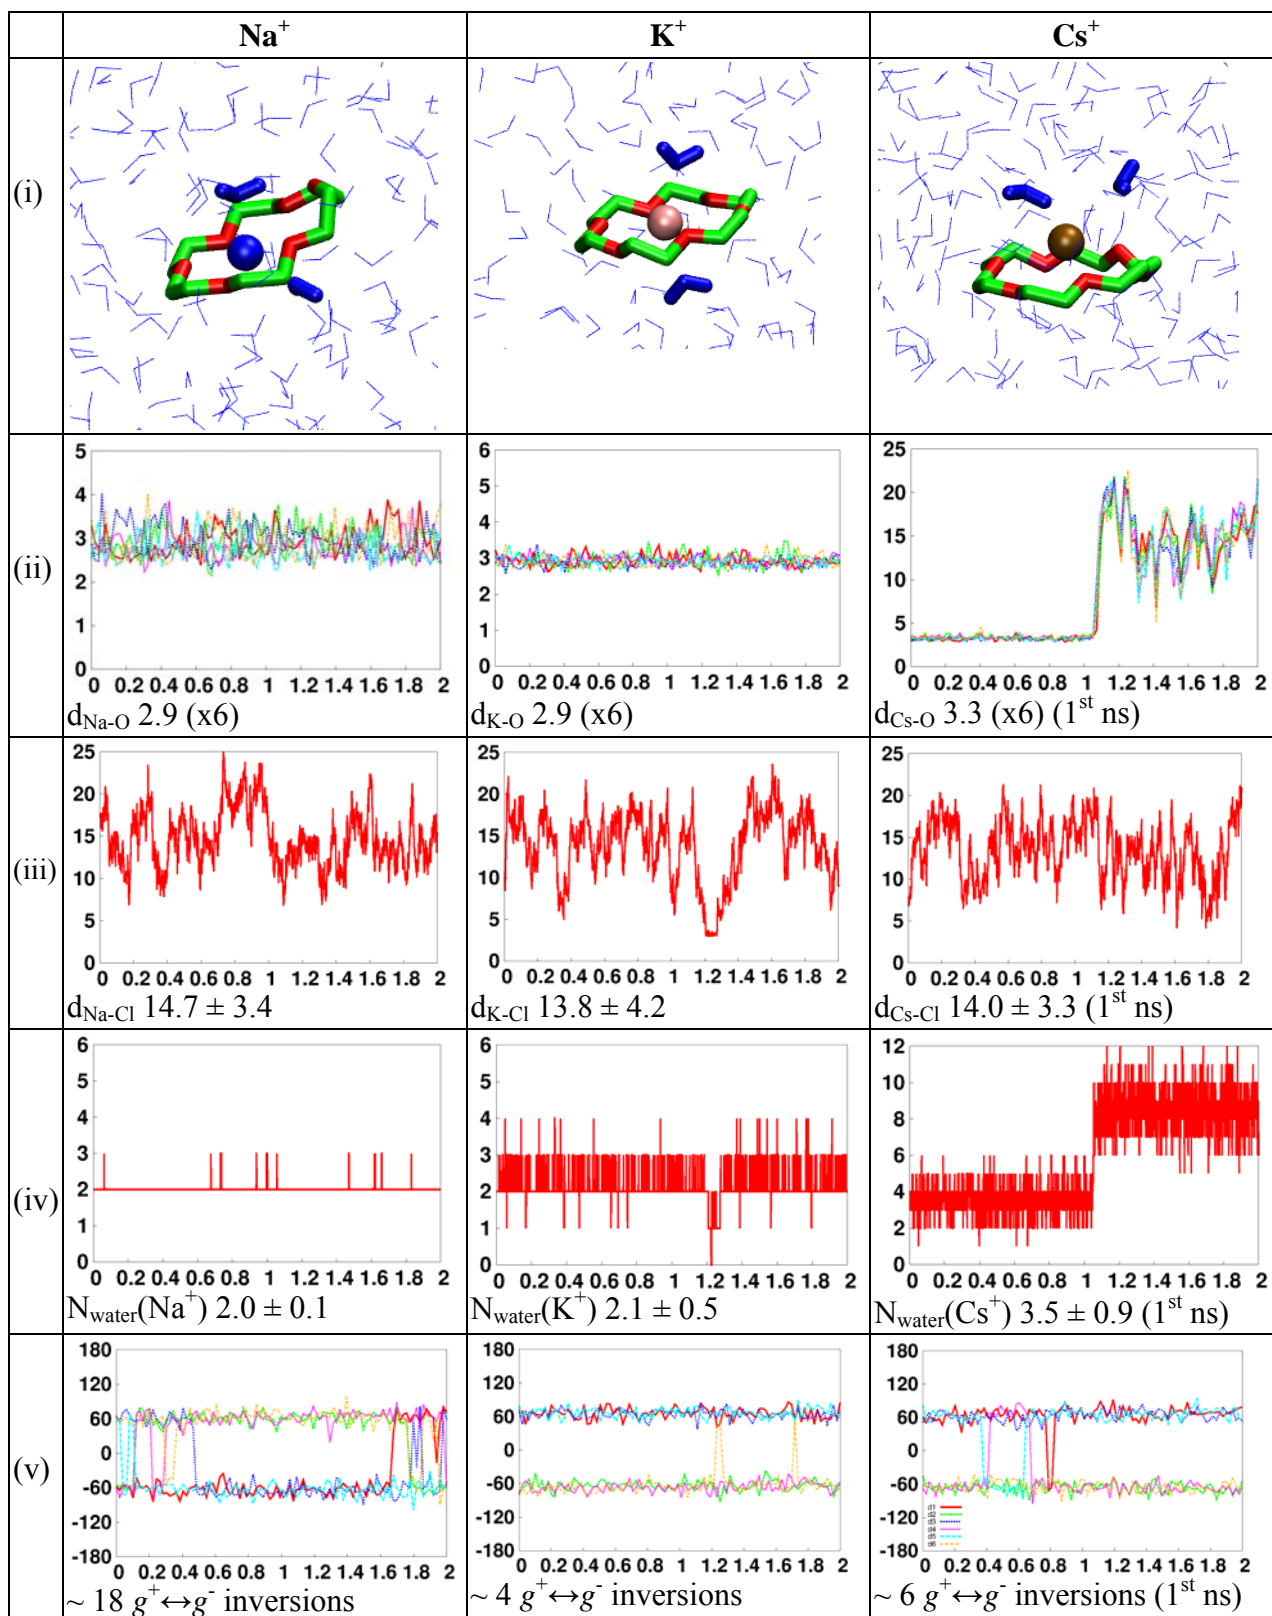

**Figure S10:** Dynamics of  $18C6(-0.34)/M^+ Pic^-$  complexes at the chloroform / water (SPC/E) interface. From top to bottom: (i) snapshots. Time evolution of (ii) distances (in Å) M-O(18C6), (iii) of M-Pic; (iv) of the number of  $H_2O$  molecules coordinated to  $M^+$ , (v) of OC-CO dihedral angles.

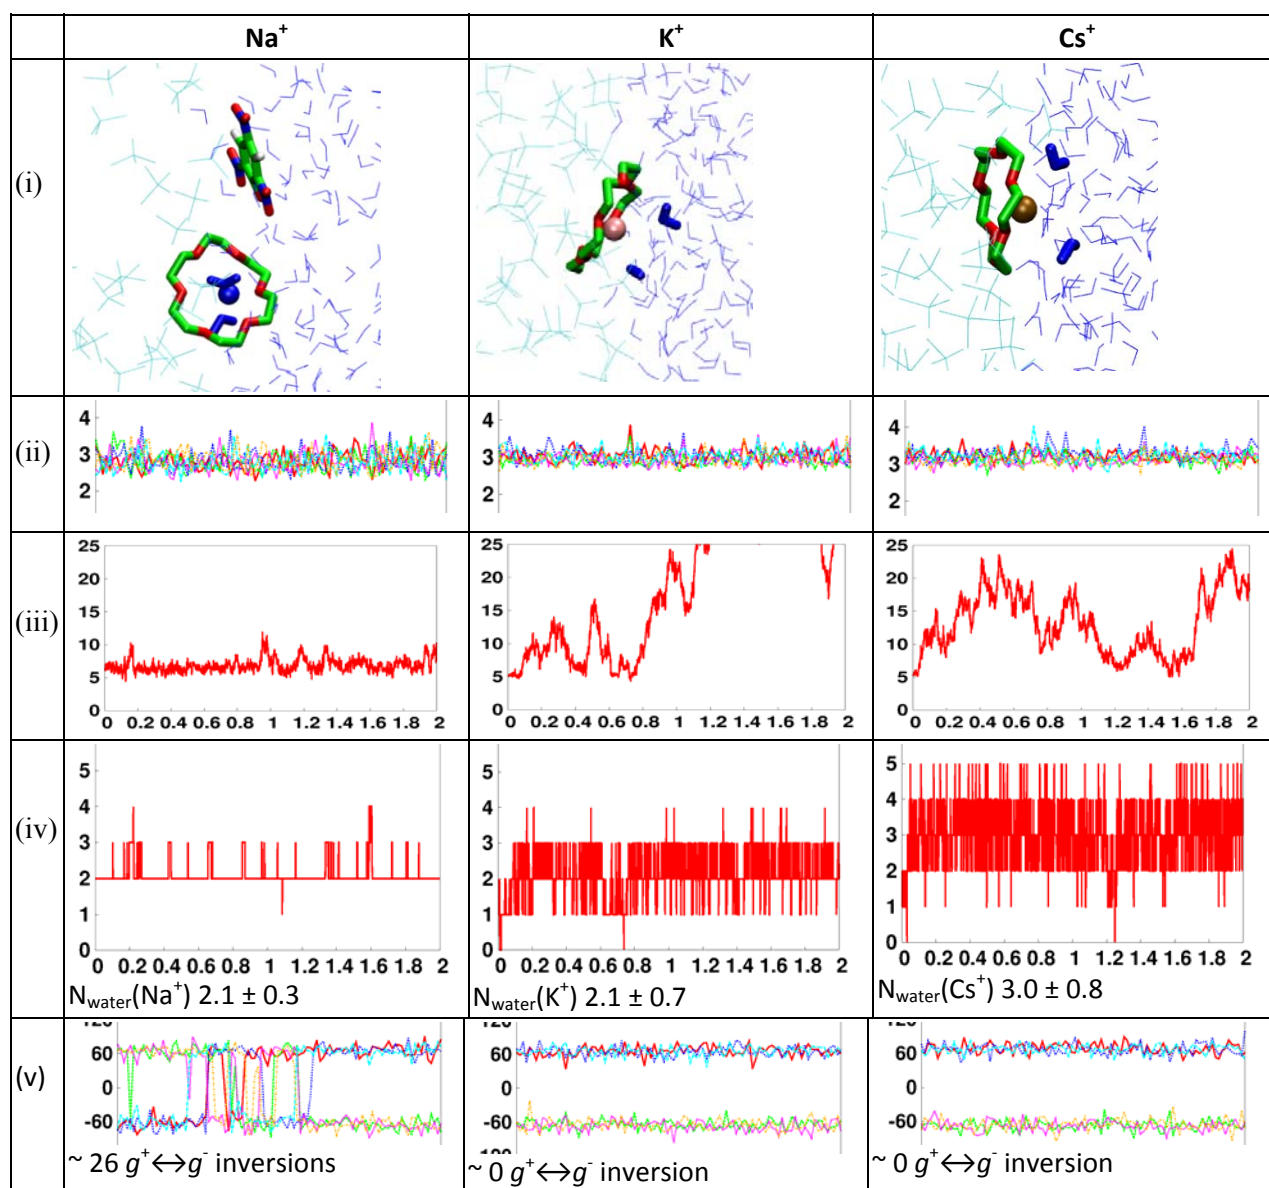

**Figure S11** . "Transfer" PMF<sub>0.5+1.0</sub> of K<sup>+</sup> Pic<sup>-</sup> across the interface. From top to bottom: free energy curve ( $\Delta A$  in kcal / mol, as a function of the  $z$  distance in Å) and snapshots at the O, I and W positions.

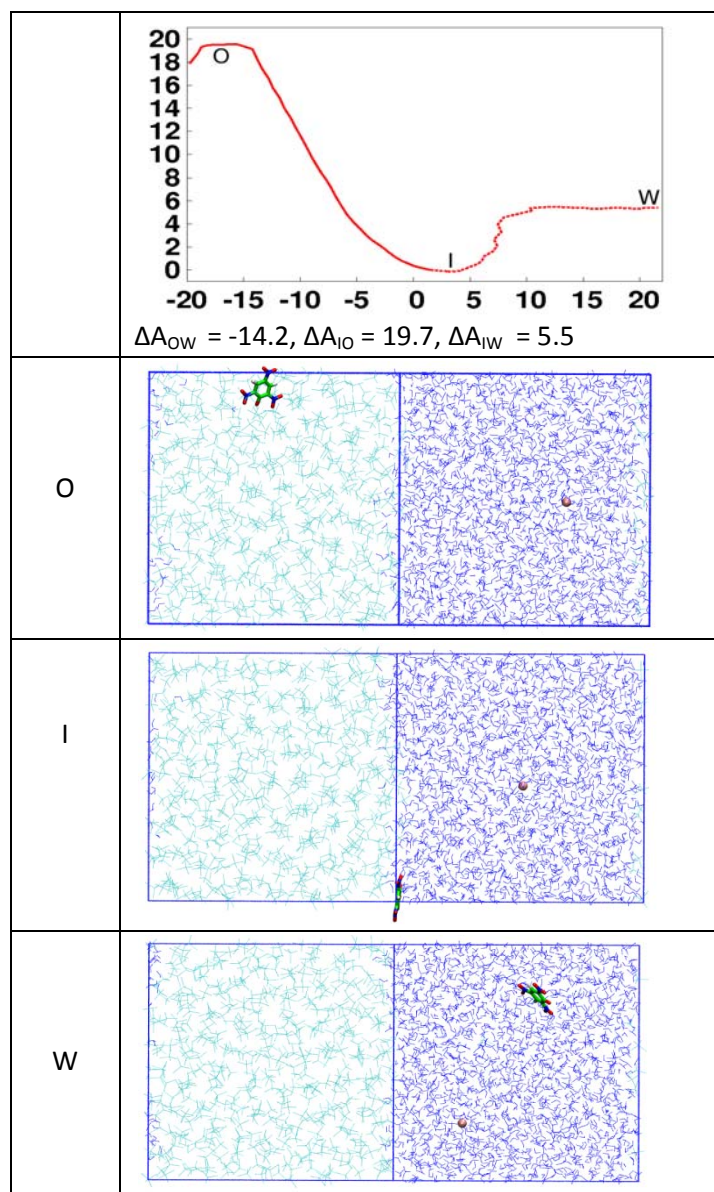



**Figure S12:** Transfer PMF<sub>0.5+1.0</sub> of 18C6 across the chloroform / water interface. Free energy curves ( $\Delta A$  in kcal / mol, as a function of the  $z$  distance in Å) with different charge models.

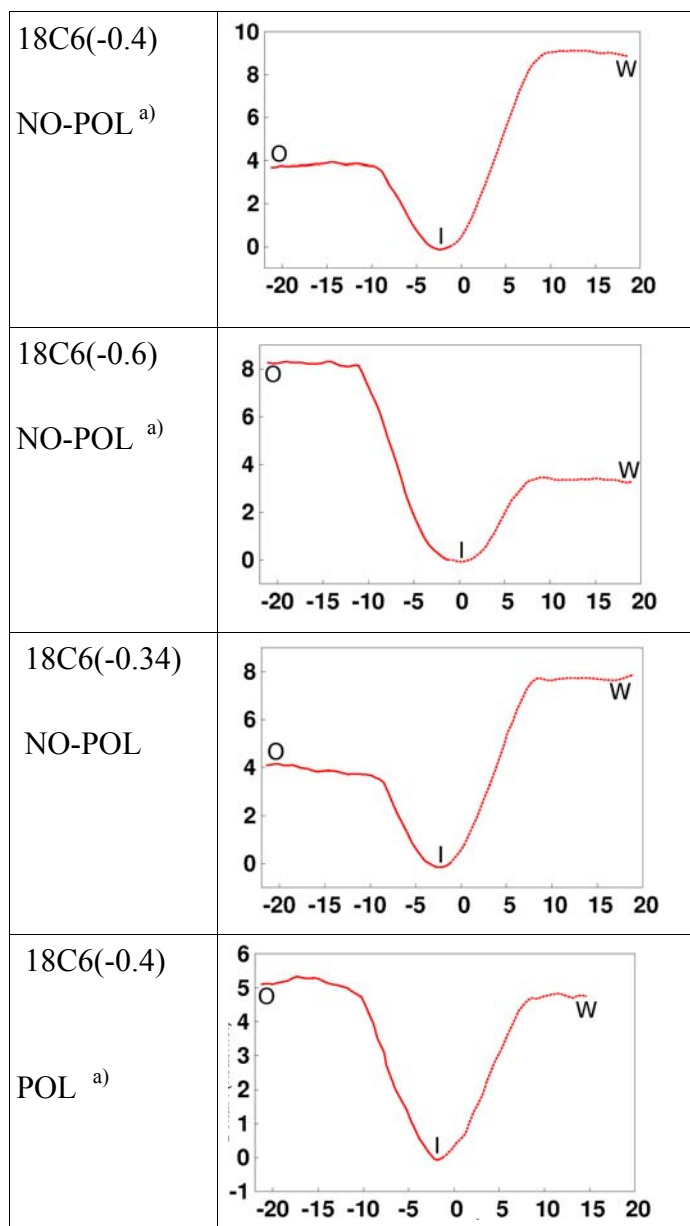

a) G. Benay and G. Wipff *J. Phys. Chem. B* **2014**, 118, 13913.

**Figure S13.** Transfer PMF<sub>0.5+1.0</sub> of the 18C6(0.6)/M<sup>+</sup> Pic<sup>-</sup> complex across the chloroform / water interface. Free energy curves ( $\Delta A$  in kcal / mol, as a function of the  $z$  distance in Å) and snapshots at the O, I and W positions.

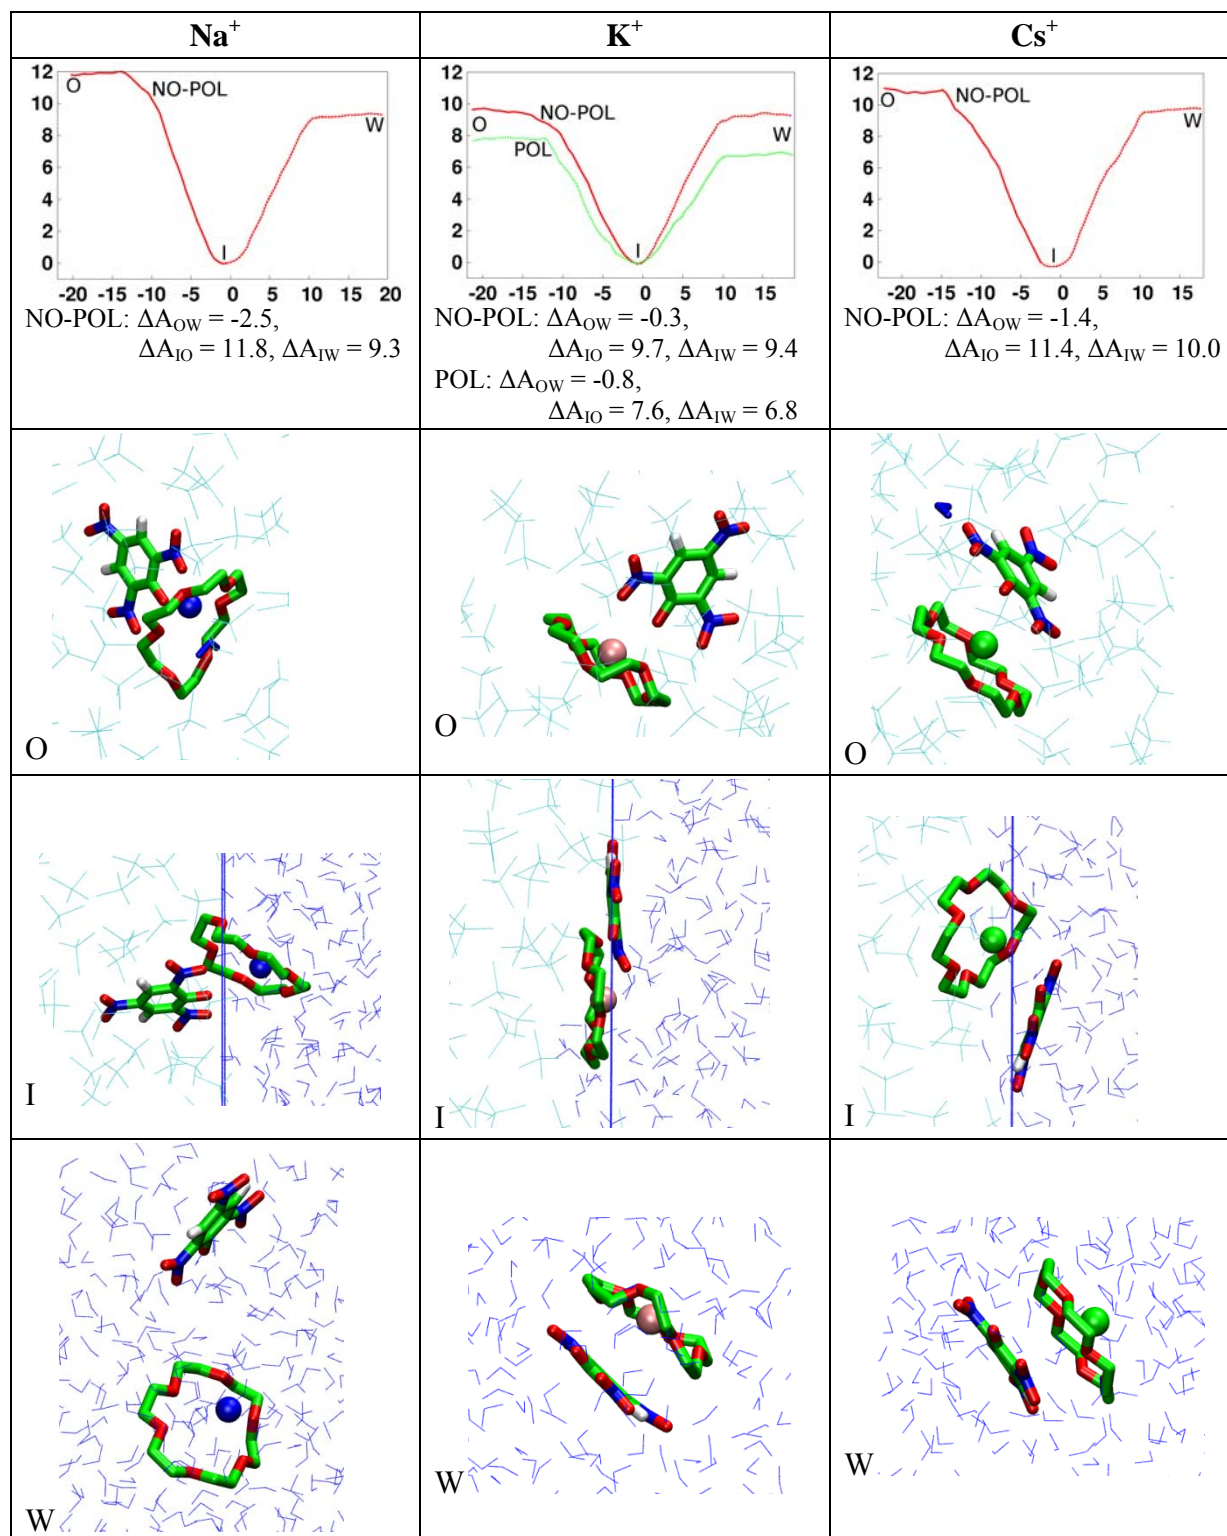

**Figure S14:** Transfer PMF of 18C6/ $K^+$  Pic $^-$  across the chloroform / water interface. Free energy curves ( $\Delta A$  in kcal / mol, as a function of the  $z$  distance in Å) and snapshots at the O, I and W positions. Comparison of four models.

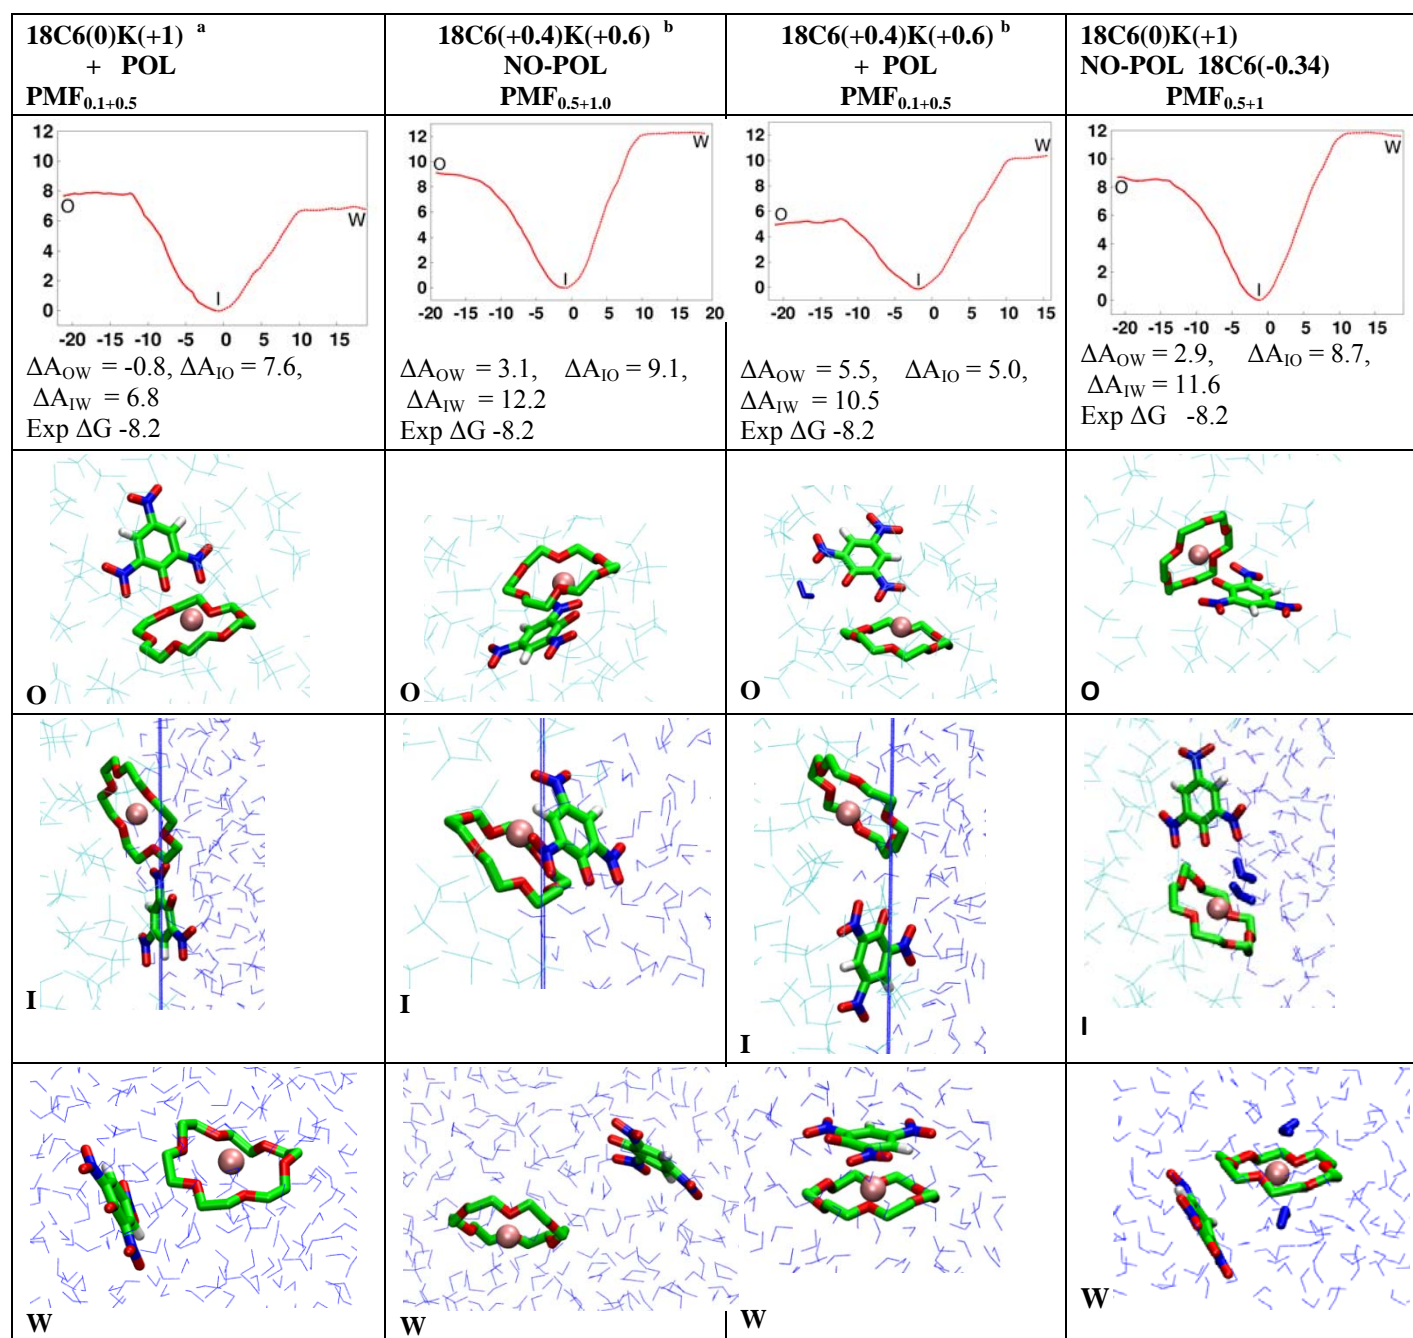

<sup>a</sup> 18C6(-0.6) charge set, and +1 charged  $K^+$

<sup>b</sup> ESP charges on the whole 18C6/ $K^+$  complex.

**Figure S15:** 30  $K^+$  18C6  $Pic^-$  species at the interface (18C6(-0.4) POL model). Zooms from Figure 8. (ii) Snapshot of the solvent box after 5 ns of dynamics; (iii)  $K^+$ –Interface distance (in Å) for the eleven complexes (color coded and labelled from 1 to 11) as a function of time (in ns), starting from the time of their formation along the dynamics (excluding the complex preformed at 0 ns)

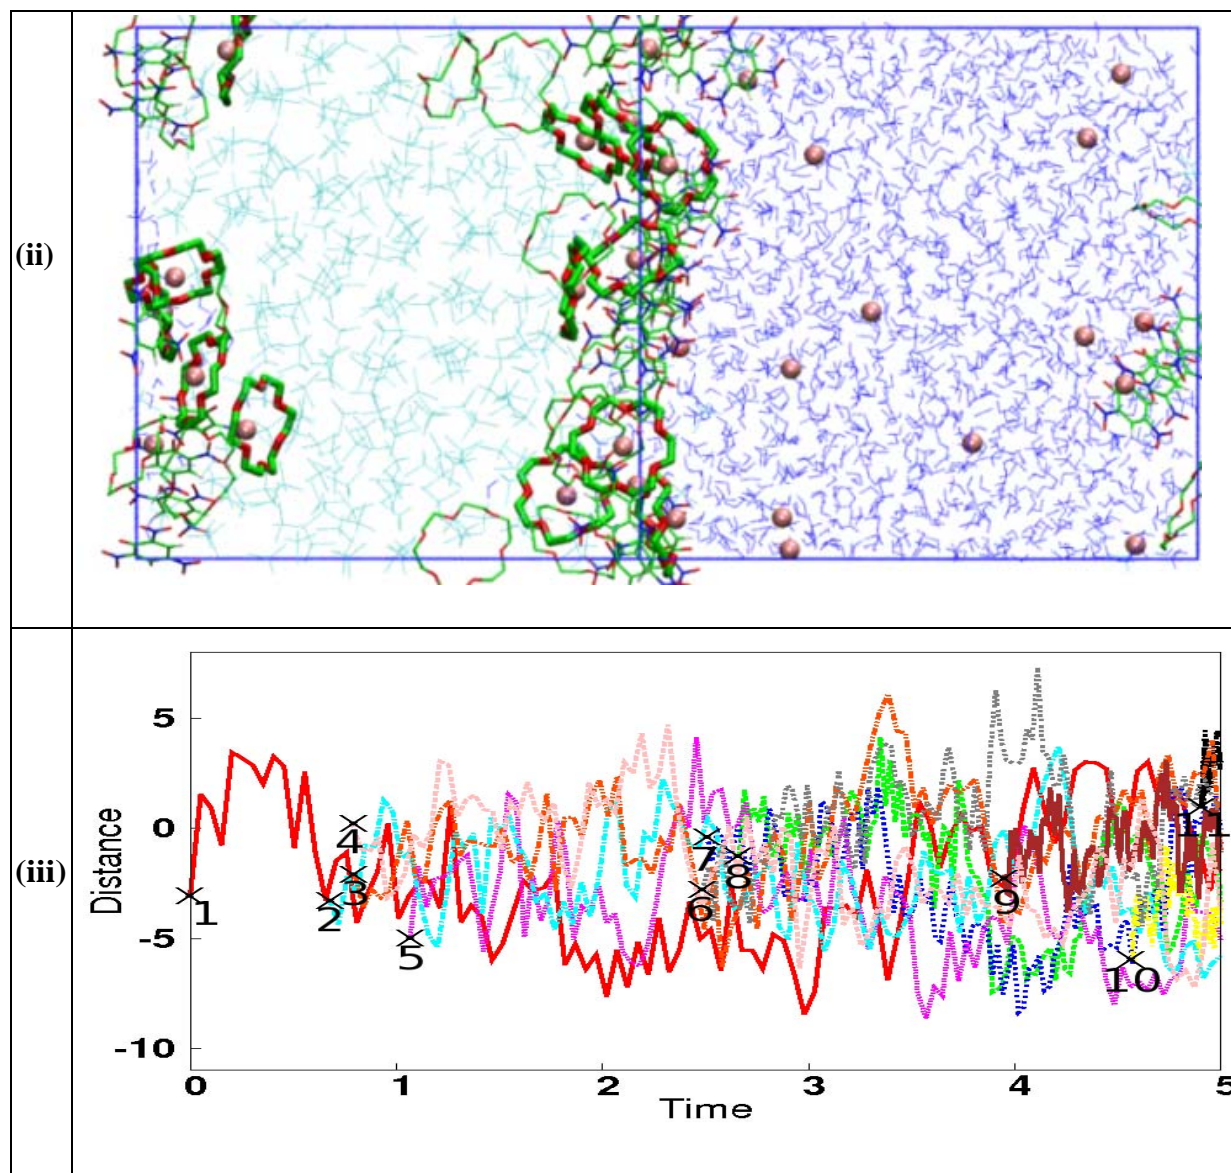

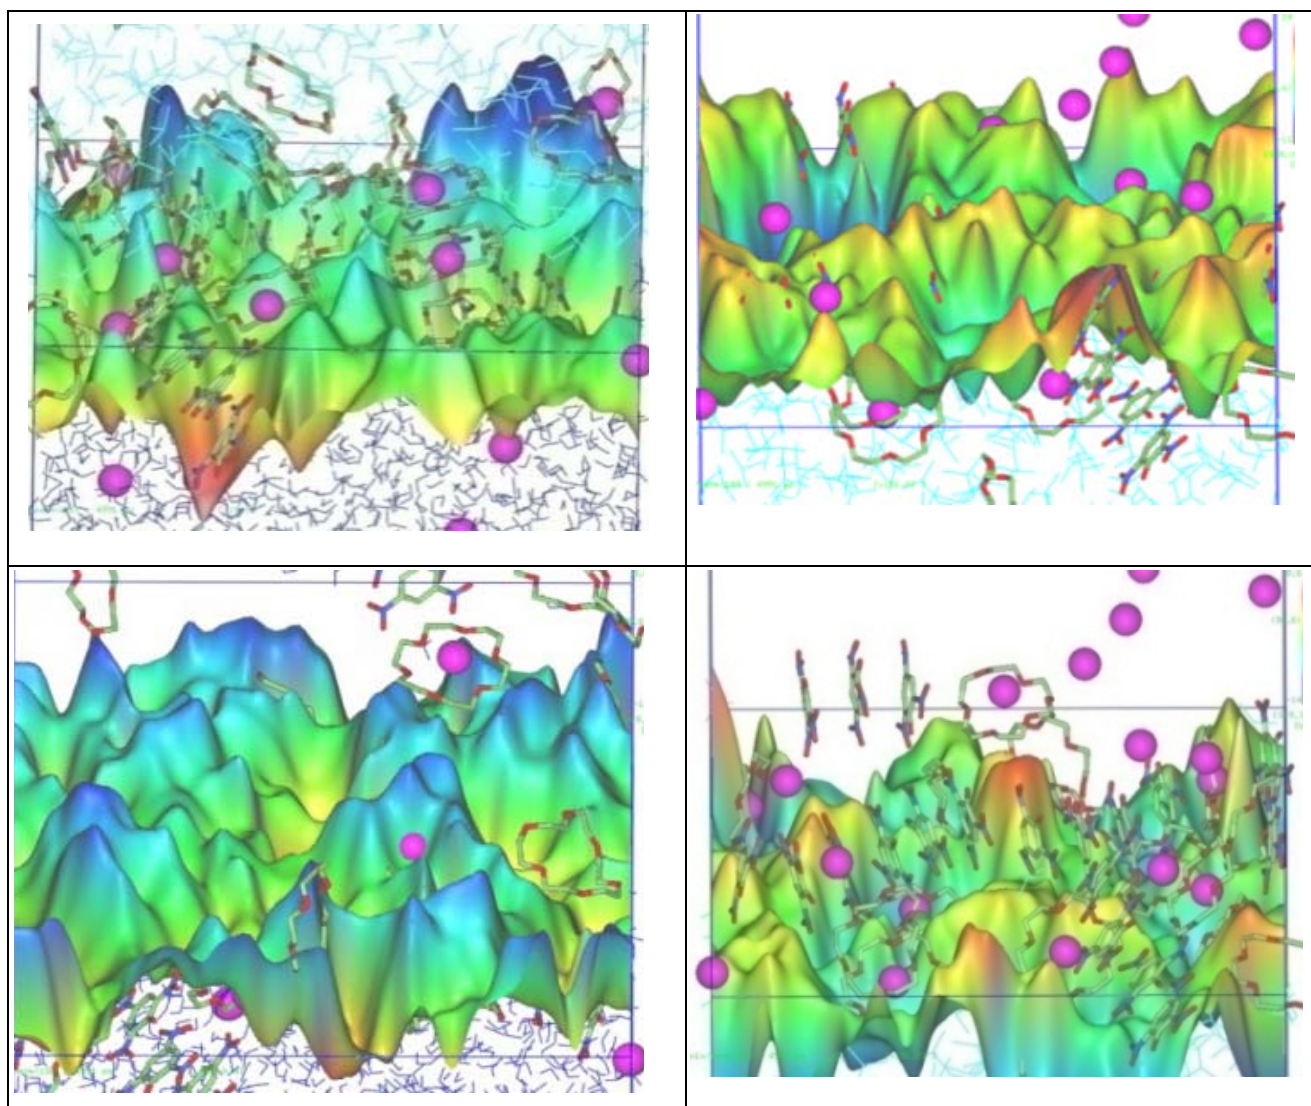

**Figure S16:** Views of the interfacial surface with 30  $K^+$  18C6  $Pic^-$  species (POL force field). The interface is shown "horizontally" with the water phase either below (left side) or on top (right side). Line 1: water surface; line 2: chloroform surface. The surface of a given liquid L is defined by the  $z_{max}$  positions of the L molecules that are not "isolated", but connected to the bulk L via other L molecules.
